# Supplementary material for: Changes in Soil-Borne Communities of Arbuscular Mycorrhizal Fungi during Natural Regrowth of Abandoned Cattle Pastures Are Indicative of Ecosystem Restoration
Source: MDPI journal article supplement (doi:10.3390/agronomy11122468), 2021-12-03
Supplement: s1 [file s1]

Supplementary Materials

# Changes in Soil-Borne Communities of Arbuscular Mycorrhizal Fungi during Natural Regrowth of Abandoned Cattle Pastures Are Indicative of Ecosystem Restoration

Carlos H. Rodríguez-León <sup>1,2</sup>, Clara P. Peña-Venegas <sup>3,\*</sup>, Armando Sterling <sup>2</sup>, Herminton Muñoz-Ramírez <sup>2</sup> and Yeny R. Virguez-Díaz <sup>2</sup>

<sup>1</sup> Doctoral Program in Natural Sciences and Sustainable Development, Faculty of Agricultural Sciences, Universidad de la Amazonía, Florencia, Caquetá 180001, Colombia; crodriguez@sinchi.org.co

<sup>2</sup> Laboratory of Phytopathology, Amazonian Scientific Research Institute Sinchi— Faculty of Basic Sciences, Universidad de la Amazonía, Florencia, Caquetá 180001, Colombia; asterling@sinchi.org.co (A.S.); hermintonr@gmail.com (H.M.-R.); ynyro-17@hotmail.com (Y.R.V.-D.)

<sup>3</sup> Laboratory of Microbiology, Amazonian Scientific Research Institute Sinchi, Leticia, Amazonas 910001, Colombia

\* Correspondence: cpena@sinchi.org.co; Tel.: +57-3108149907

## Supplementary Figures

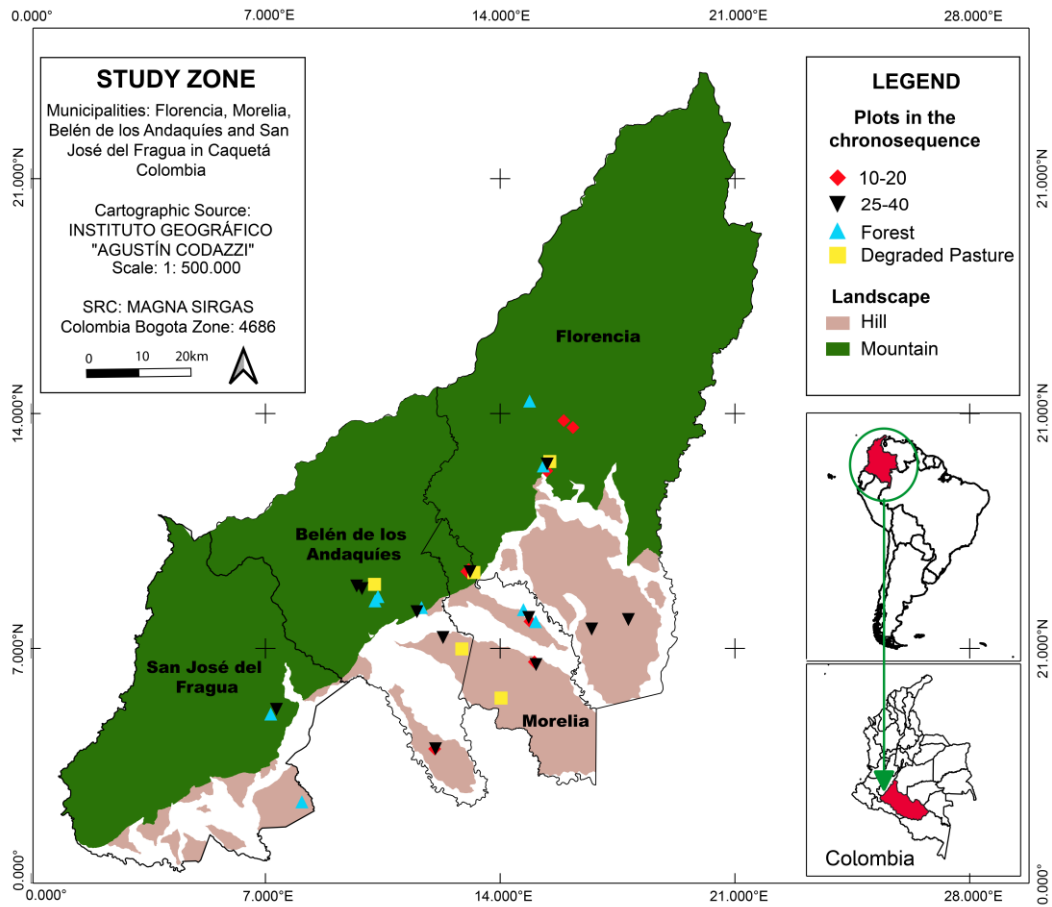

**Figure S1.** Map of the study area (Caquetá state, Northwestern Colombian Amazon).

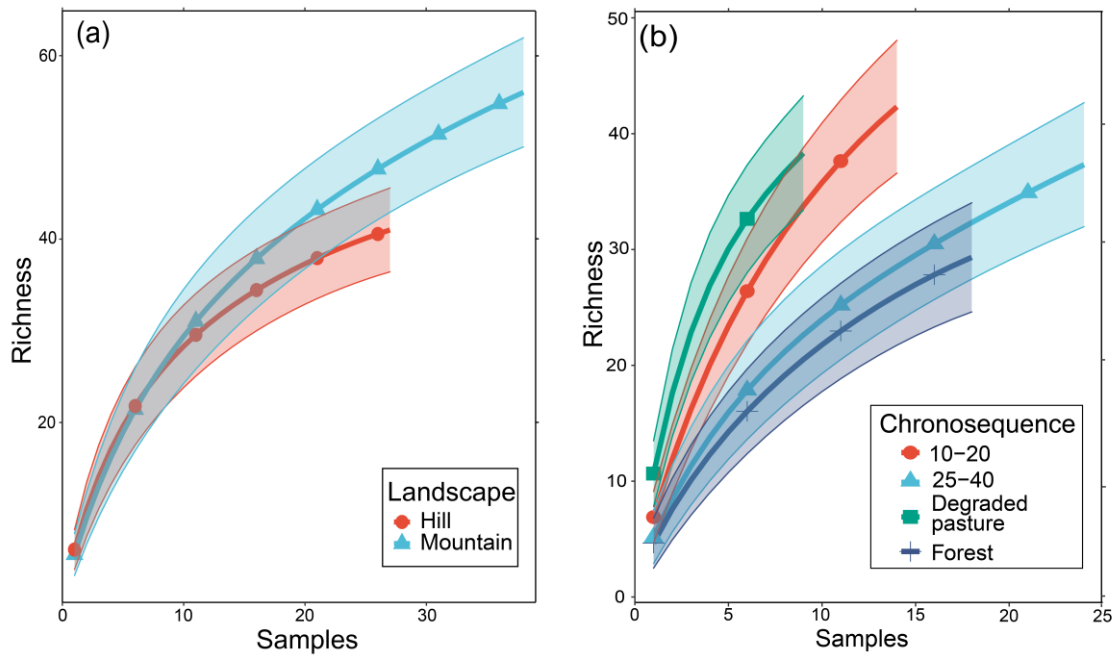

**Figure S2.** Accumulation curves (Mau-Tau method with a 95% confidence interval) of arbuscular mycorrhizal fungal species in soils of different landscapes (a), and different successional stages of a degraded pasture natural regrowth (b)

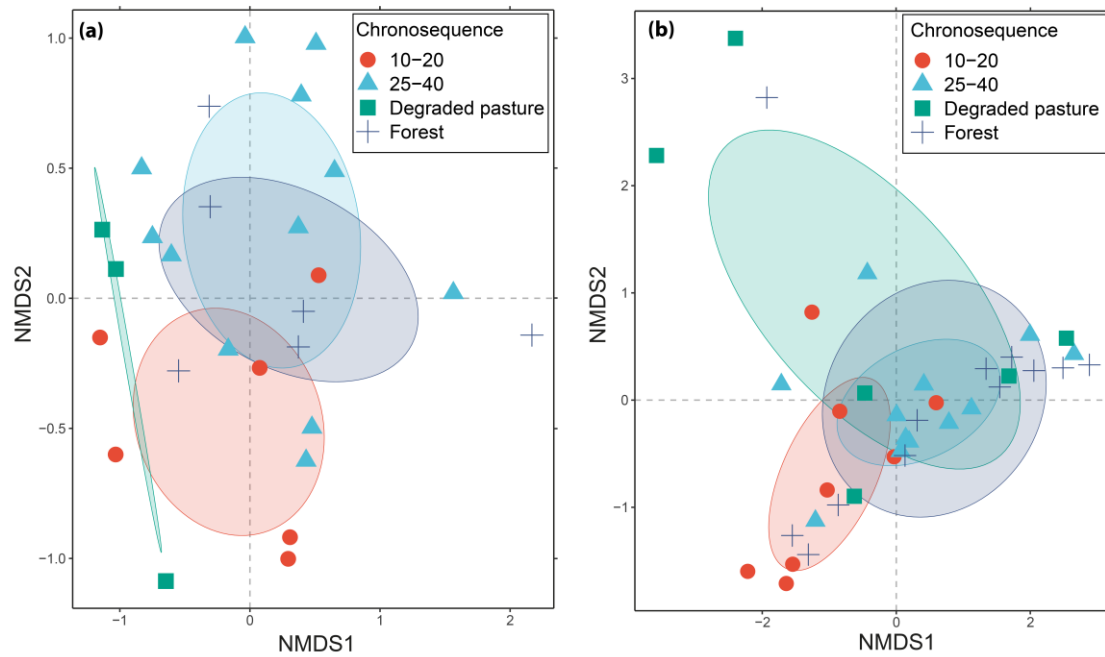

**Figure S3.** Non-metric multidimensional scaling (NMDS) plots displaying the composition of arbuscular mycorrhizal fungal communities in the hill landscape (a) and the mountain landscape (b) over successional stages of a degraded pasture natural regrowth

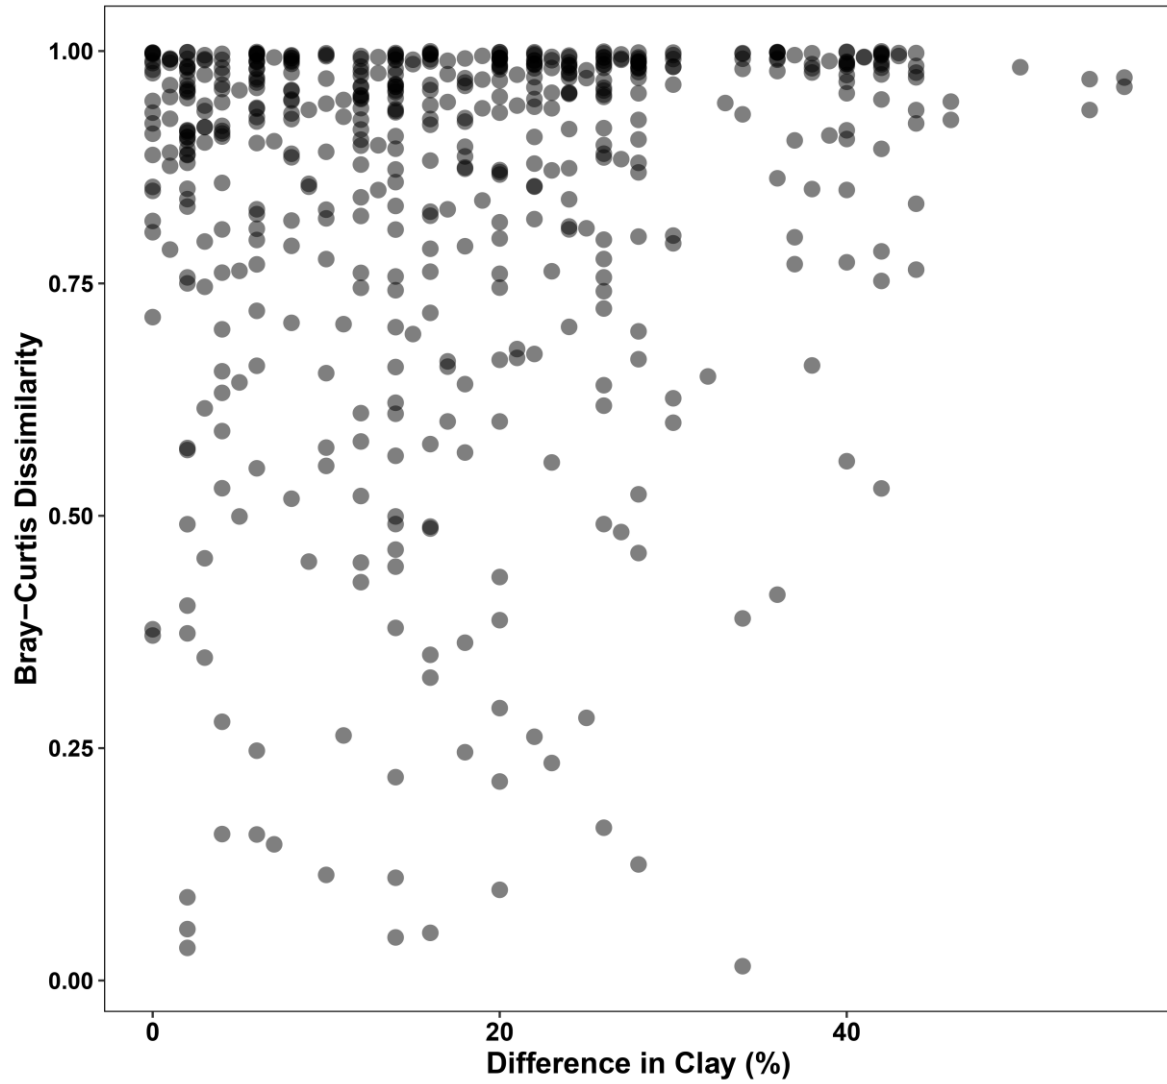

**Figure S4.** Mantel correlation scatter-plot between the dissimilarity of arbuscular mycorrhizal fungal VT species abundance (Bray-Curtis distance) and dissimilarity of the percentage of clay (Euclidean distance)

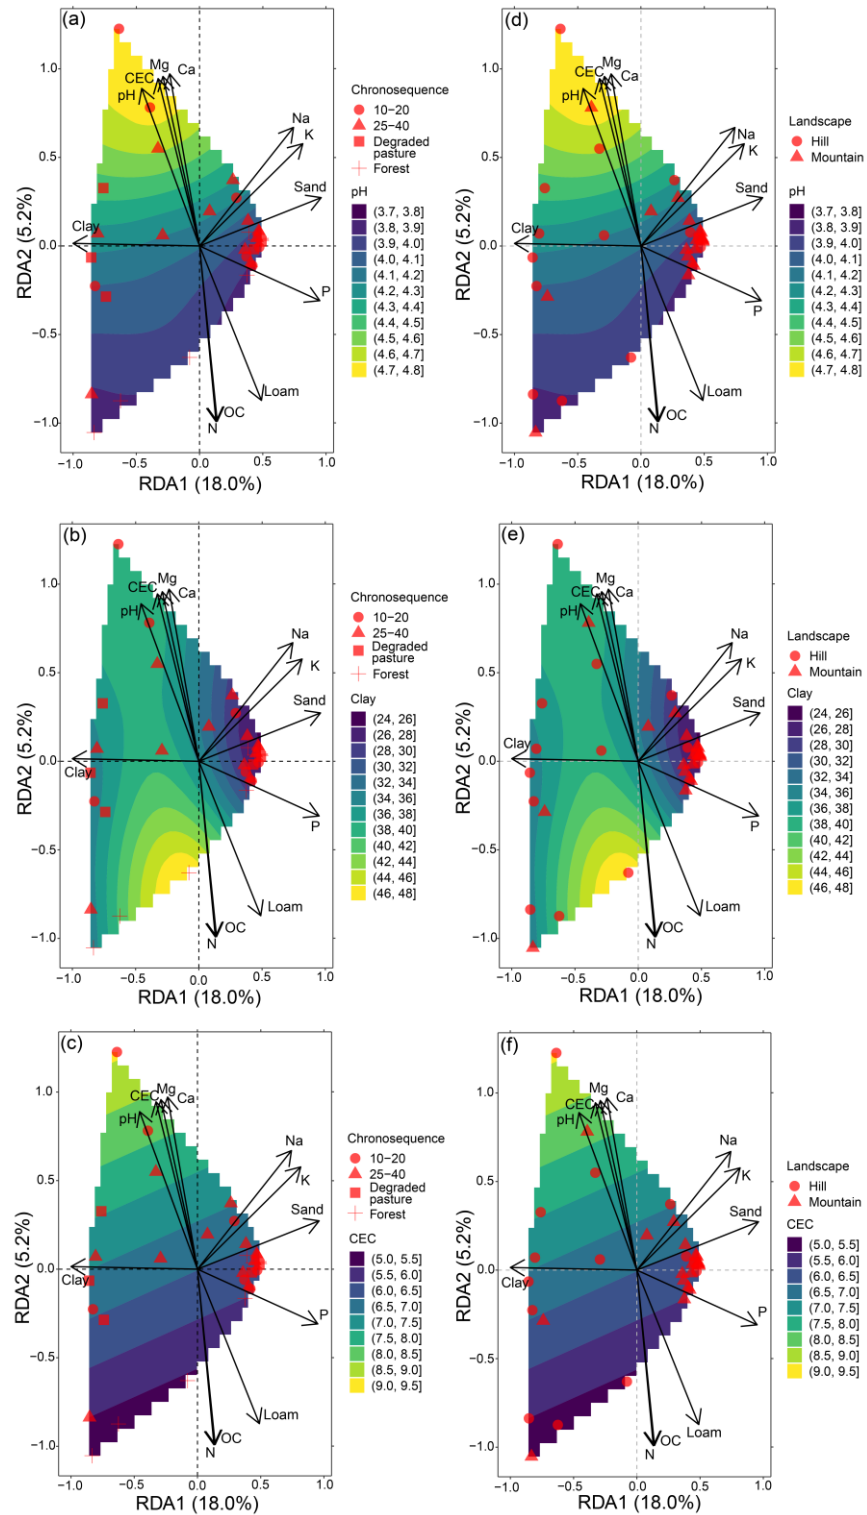

**Figure S5.** Redundancy analysis (RDA) of arbuscular mycorrhizal fungal species according to a soil (pH, clay and CEC) gradient in the different successional stages of a degraded pasture natural regrowth (a, b and c), and landscapes (d, e and f)

## Supplementary Tables

**Table S1.** Soil samples collected and analyzed to study arbuscular mycorrhizal fungal communities.

|                        |             |             |              |           |                |      | No. soil          | No. AMF          |
|------------------------|-------------|-------------|--------------|-----------|----------------|------|-------------------|------------------|
| Municipality           | Location    | N           | W            | Landscape | Chronosequence | Plot | samples collected | samples analyzed |
|                        |             |             |              |           | Degraded       |      |                   |                  |
| Morelia                | Caldas      | 1°30'31.41" | 75°44'9.57"  | Mountain  | pasture        | DM11 | 3                 | 2                |
|                        |             |             |              |           | Degraded       |      |                   |                  |
| Belén de los Andaquíes | Aletones    | 1°29'32.57" | 75°52'20.63" | Mountain  | pasture        | DM15 | 3                 | 2                |
|                        |             |             |              |           | Degraded       |      |                   |                  |
| Florencia              | Bajo caldas | 1°39'39.45" | 75°37'54.36" | Mountain  | pasture        | DM6  | 3                 | 2                |
| Morelia                | Caldas      | 1°30'36.47" | 75°44'35.56" | Mountain  | 10-20          | DM10 | 3                 | 2                |
| Florencia              | Bajo caldas | 1°38'53.46  | 75°38'9.79"  | Mountain  | 10-20          | DM16 | 3                 | 2                |
| Florencia              | Palmichal   | 1°42´27,6"  | 75°35´59,8"  | Mountain  | 10-20          | DM2  | 3                 | 2                |
| Florencia              | Palmichal   | 1°43'01.70" | 75°36'45.40" | Mountain  | 10-20          | DM1  | 3                 | 2                |

|                        |                     |             |               |          |          |      |   |   |
|------------------------|---------------------|-------------|---------------|----------|----------|------|---|---|
| Morelia                | Caldas              | 1°30'37.05" | 75°44'27.01"  | Mountain | 25-40    | DM12 | 3 | 2 |
| San José del Fragua    | Bellavista          | 1°19'16.21" | 76°00'21.30"  | Mountain | 25-40    | DM13 | 3 | 2 |
| Belén de los Andaquíes | El chocho           | 1°27'20.25" | 75°48'43.93"  | Mountain | 25-40    | DM14 | 3 | 2 |
| Belén de los Andaquíes | S. Antonio de Padua | 1°29'24.66" | 75°53'23.74"  | Mountain | 25-40    | DM17 | 3 | 2 |
| Florencia              | Bajo caldas         | 1°39' 23.7" | 75° 38' 06.0" | Mountain | 25-40    | DM7  | 3 | 2 |
| Belén de los Andaquíes | S. Antonio de Padua | 1°29'26.91" | 75°53'40.34"  | Mountain | 25-40    | DM8  | 3 | 2 |
| Belén de los Andaquíes | El porvenir         | 1°28' 22.9" | 75°52' 06.7"  | Mountain | Forest   | RM11 | 3 | 2 |
| San José del Fragua    | Bellavista          | 1°18' 52.2" | 76°00' 53.6"  | Mountain | Forest   | RM13 | 3 | 2 |
| Belén de los Andaquíes | Chocho alto         | 1°27' 38.2" | 75°48' 28.4"  | Mountain | Forest   | RM14 | 3 | 2 |
| Florencia              | Bajo caldas         | 1°39' 17.9" | 75° 38' 26.6" | Mountain | Forest   | RM3  | 3 | 2 |
| Florencia              | Caraño              | 1°44'38,4"  | 75°39'34,2"   | Mountain | Forest   | RM8  | 3 | 2 |
| Belén de los Andaquíes | El porvenir         | 1°28' 32.7" | 75° 52' 03.8" | Mountain | Forest   | RM9  | 3 | 2 |
|                        |                     |             |               |          | Degraded |      |   |   |
| Morelia                | Caldas              | 1°24'13.68" | 75°45'9.24"   | Hill     | pasture  | DL11 | 3 | 2 |
|                        |                     |             |               |          | Degraded |      |   |   |
| Morelia                | Morelia             | 1°20'10.96" | 75°41'55.32"  | Hill     | pasture  | DL10 | 3 | 1 |



|                        |               |              |               |      |        |      |   |   |
|------------------------|---------------|--------------|---------------|------|--------|------|---|---|
| Morelia                | San Marcos    | 1°23'9.3"    | 75°39'10.38"  | Hill | 10-20  | DL12 | 3 | 2 |
| Morelia                | Lagunilla     | 1°26'23.6"   | 75°39'20.4"   | Hill | 10-20  | DL2  | 3 | 2 |
| Belén de los Andaquíes | Puerto Torres | 1°15'59.9"   | 75°47'23.4"   | Hill | 10-20  | DL6  | 3 | 2 |
| Morelia                | San Marcos    | 1°23'24.2"   | 75°39'04.0"   | Hill | 25-40  | DL13 | 3 | 2 |
| Florencia              | Balcanes      | 1° 26' 39.1" | 75° 31' 29.1" | Hill | 25-40  | DL16 | 3 | 2 |
| Morelia                | Lagunilla     | 1°27'21.63"  | 75°39'48.10"  | Hill | 25-40  | DL3  | 3 | 2 |
| Belén de los Andaquíes | El chocho     | 1°25'26.6"   | 75°46'43.27"  | Hill | 25-40  | DL5  | 3 | 2 |
| Belén de los Andaquíes | Puerto Torres | 1°16'8.3"    | 75°47'17.6"   | Hill | 25-40  | DL7  | 3 | 2 |
| Florencia              | Tominejo      | 1°25' 54.1"  | 75°34' 24.57" | Hill | 25-40  | DL14 | 3 | 2 |
| Morelia                | Lagunilla     | 1°26'28.8"   | 75°39'10.3"   | Hill | Forest | RL2  | 3 | 2 |
| Morelia                | Lagunilla     | 1°27' 27.9"  | 75°39' 58.9"  | Hill | Forest | RL3  | 3 | 2 |
| San José del Fragua    | El Triunfo    | 1°11' 38.4"  | 75°58' 19.7"  | Hill | Forest | RL4  | 3 | 2 |

---

**Table S2.** Arbuscular mycorrhizal fungal virtual taxon (VT) recovered from two landscapes and four successional stages in a natural regrowth chronosequence of abandoned pastures in the Andean-Amazonian transition. Abundance as the number of read VT accounts.

| Taxonomy             |                         |                   |         | Landscape |          | Chronosequence   |         |       |        |             |
|----------------------|-------------------------|-------------------|---------|-----------|----------|------------------|---------|-------|--------|-------------|
| Family               | Genus                   | Species           | VT      | Hill      | Mountain | Degraded pasture | 10 - 20 | 25-40 | Forest | Total reads |
| Acaulosporaceae      | <i>Acaulospora</i>      | sp.               | VT24    | 31        | 135      | 85               | 6       | 29    | 46     | 166         |
|                      | <i>Acaulospora</i>      | sp.               | VT102   | 1         | 0        | 0                | 0       | 0     | 1      | 1           |
|                      | <i>Acaulospora</i>      | sp.               | VT227   | 20        | 0        | 0                | 18      | 2     | 0      | 20          |
|                      | <i>Acaulospora</i>      | sp.               | VT26    | 0         | 4        | 0                | 4       | 0     | 0      | 4           |
|                      | <i>Acaulospora</i>      | sp.               | VT231   | 99        | 43       | 65               | 48      | 29    | 0      | 142         |
|                      | <i>Acaulospora</i>      | sp.               | VT15    | 210       | 0        | 0                | 210     | 0     | 0      | 210         |
|                      | <i>Kuklospora</i>       | sp.               | VT249   | 0         | 3        | 2                | 0       | 1     | 0      | 3           |
| Ambisporaceae        | <i>Ambispora</i>        | <i>leptoticha</i> | VT242   | 24        | 0        | 24               | 0       | 0     | 0      | 24          |
| Archaeosporaceae     | <i>Archaeospora</i>     | sp.               | VT4     | 7         | 1778     | 1778             | 3       | 0     | 4      | 1785        |
|                      | <i>Archaeospora</i>     | sp.               | MO-Ar10 | 35        | 1        | 34               | 0       | 1     | 1      | 36          |
| Claroideoglomeraceae | <i>Claroideoglossus</i> |                   | LH-CI01 | 342       | 94       | 315              | 0       | 121   | 0      | 436         |
| Gigasporaceae        | <i>Gigaspora</i>        | <i>decipiens</i>  | VT39    | 571       | 87       | 630              | 8       | 4     | 16     | 658         |

|             |                      |                    |       |      |      |      |     |     |     |      |
|-------------|----------------------|--------------------|-------|------|------|------|-----|-----|-----|------|
|             | <i>Scutellospora</i> | <i>castanea</i>    | VT41  | 0    | 29   | 1    | 0   | 0   | 28  | 29   |
|             | <i>Scutellospora</i> | sp.                | VT318 | 0    | 4    | 4    | 0   | 0   | 0   | 4    |
| Glomeraceae | <i>Glomus</i>        | <i>coremioides</i> | VT368 | 28   | 1    | 0    | 3   | 25  | 1   | 29   |
|             | <i>Glomus</i>        | sp.                | VT222 | 0    | 11   | 0    | 11  | 0   | 0   | 11   |
|             | <i>Glomus</i>        | sp.                | VT135 | 0    | 10   | 0    | 10  | 0   | 0   | 10   |
|             | <i>Glomus</i>        | sp.                | VT209 | 0    | 4    | 0    | 4   | 0   | 0   | 4    |
|             | <i>Glomus</i>        | sp.                | VT191 | 0    | 2    | 0    | 2   | 0   | 0   | 2    |
|             | <i>Glomus</i>        | sp.                | VT87  | 16   | 12   | 2    | 3   | 17  | 6   | 28   |
|             | <i>Glomus</i>        | sp.                | VT269 | 152  | 99   | 129  | 39  | 9   | 74  | 251  |
|             | <i>Glomus</i>        | sp.                | VT280 | 5    | 8    | 3    | 3   | 3   | 4   | 13   |
|             | <i>Glomus</i>        | sp.                | VT126 | 622  | 1162 | 747  | 75  | 480 | 482 | 1784 |
|             | <i>Glomus</i>        | sp.                | VT223 | 8174 | 14   | 7409 | 770 | 8   | 1   | 8188 |
|             | <i>Glomus</i>        | sp.                | VT80  | 10   | 31   | 12   | 23  | 5   | 1   | 41   |
|             | <i>Glomus</i>        | sp.                | VT76  | 50   | 85   | 34   | 15  | 8   | 78  | 135  |
|             | <i>Glomus</i>        | sp.                | VT268 | 0    | 1    | 0    | 0   | 0   | 1   | 1    |
|             | <i>Glomus</i>        | sp.                | VT292 | 373  | 278  | 162  | 185 | 164 | 140 | 651  |

|               |     |         |      |      |      |     |     |     |      |
|---------------|-----|---------|------|------|------|-----|-----|-----|------|
| <i>Glomus</i> | sp. | VT312   | 34   | 29   | 16   | 43  | 2   | 2   | 63   |
| <i>Glomus</i> | sp. | VTX89   | 1404 | 627  | 1298 | 352 | 109 | 272 | 2031 |
| <i>Glomus</i> | sp. | LH-GI07 | 0    | 2    | 0    | 0   | 0   | 2   | 2    |
| <i>Glomus</i> | sp. | VT360   | 0    | 2    | 0    | 1   | 1   | 0   | 2    |
| <i>Glomus</i> | sp. | LH-GI05 | 0    | 16   | 13   | 0   | 3   | 0   | 16   |
| <i>Glomus</i> | sp. | VT124   | 2    | 6    | 1    | 0   | 5   | 2   | 8    |
| <i>Glomus</i> | sp. | VT70    | 449  | 123  | 144  | 16  | 292 | 120 | 572  |
| <i>Glomus</i> | sp. | VT343   | 6    | 1419 | 1424 | 0   | 1   | 0   | 1425 |
| <i>Glomus</i> | sp. | VT93    | 51   | 36   | 53   | 0   | 7   | 27  | 87   |
| <i>Glomus</i> | sp. | VT79    | 253  | 263  | 118  | 117 | 241 | 40  | 516  |
| <i>Glomus</i> | sp. | VT215   | 0    | 4    | 0    | 1   | 1   | 2   | 4    |
| <i>Glomus</i> | sp. | VT359   | 601  | 338  | 196  | 29  | 142 | 572 | 939  |
| <i>Glomus</i> | sp. | MO-G76  | 0    | 1    | 0    | 0   | 1   | 0   | 1    |
| <i>Glomus</i> | sp. | VT111   | 1    | 0    | 0    | 1   | 0   | 0   | 1    |
| <i>Glomus</i> | sp. | VT247   | 0    | 1    | 0    | 0   | 1   | 0   | 1    |
| <i>Glomus</i> | sp. | VT253   | 702  | 1    | 639  | 64  | 0   | 0   | 703  |

|                    |               |        |     |     |     |    |     |   |     |
|--------------------|---------------|--------|-----|-----|-----|----|-----|---|-----|
| <i>Glomus</i>      | sp.           | VT433  | 1   | 8   | 0   | 9  | 0   | 0 | 9   |
| <i>Glomus</i>      | sp.           | VT96   | 152 | 7   | 20  | 32 | 107 | 0 | 159 |
| <i>Glomus</i>      | sp.           | MO-G74 | 7   | 3   | 0   | 10 | 0   | 0 | 10  |
| <i>Glomus</i>      | sp.           | VT101  | 59  | 145 | 199 | 5  | 0   | 0 | 204 |
| <i>Glomus</i>      | sp.           | VT370  | 9   | 1   | 0   | 0  | 1   | 9 | 10  |
| <i>Glomus</i>      | sp.           | VT426  | 55  | 15  | 0   | 64 | 6   | 0 | 70  |
| <i>Glomus</i>      | sp.           | VT399  | 4   | 0   | 4   | 0  | 0   | 0 | 4   |
| <i>Glomus</i>      | sp.           | VT270  | 0   | 1   | 1   | 0  | 0   | 0 | 1   |
| <i>Glomus</i>      | sp.           | VT167  | 0   | 31  | 0   | 0  | 31  | 0 | 31  |
| <i>Glomus</i>      | sp.           | VT166  | 3   | 0   | 0   | 3  | 0   | 0 | 3   |
| <i>Glomus</i>      | sp.           | GCL-4  | 0   | 72  | 0   | 72 | 0   | 0 | 72  |
| <i>Glomus</i>      | sp.           | VT183  | 53  | 0   | 53  | 0  | 0   | 0 | 53  |
| <i>Glomus</i>      | sp.           | VT178  | 0   | 46  | 27  | 0  | 19  | 0 | 46  |
| <i>Glomus</i>      | sp.           | VT454  | 0   | 50  | 32  | 17 | 1   | 0 | 50  |
| <i>Glomus</i>      | sp.           | VT219  | 0   | 1   | 0   | 0  | 0   | 1 | 1   |
| <i>Rhizophagus</i> | <i>clarum</i> | VT264  | 1   | 1   | 1   | 1  | 0   | 0 | 2   |

|                 |                    |                  |       |       |       |       |      |       |       |       |
|-----------------|--------------------|------------------|-------|-------|-------|-------|------|-------|-------|-------|
|                 | <i>Rhizophagus</i> | <i>manihotis</i> | VT90  | 10    | 5     | 7     | 1    | 1     | 6     | 15    |
| Paraglomeraceae | <i>Paraglomus</i>  | sp.              | VT444 | 2106  | 35280 | 6816  | 2042 | 10698 | 17830 | 37386 |
|                 | <i>Paraglomus</i>  | sp.              | VT1   | 0     | 18    | 0     | 18   | 0     | 0     | 18    |
|                 | <i>Paraglomus</i>  | sp.              | VT446 | 0     | 18    | 0     | 18   | 0     | 0     | 18    |
| TOTAL           |                    |                  |       | 16733 | 42466 | 22498 | 4356 | 12576 | 19769 | 59199 |
